# Supplementary material for: One-pot synthesis of stable and functional hydrophilic CsPbBr3 perovskite quantum dots for “turn-on” fluorescence detection of Mycobacterium tuberculosis
Source: Royal Society of Chemistry journal article supplement (doi:10.1039/d1dt03624f), 2022-01-01
Supplement: d1dt03624f1.pdf [file d1dt03624f1.pdf]

## Supplementary Material

### **One-pot synthesis of stable and functional hydrophilic CsPbBr<sub>3</sub> perovskite quantum dots for “turn-on” fluorescence detection of *Mycobacterium tuberculosis***

Xue Jiang,<sup>a</sup> Hongwei Zeng,<sup>a</sup> Changyuan Duan,<sup>a</sup> Qianfang Hu,<sup>b</sup> Qiaomin Wu,<sup>a</sup> Yang Yu <sup>a</sup> and Xiaolan Yang,<sup>\*a</sup>

<sup>a</sup> *Key Laboratory of Laboratory Medical Diagnostics, Ministry of Education, College of Laboratory Medicine, Chongqing Medical University, Chongqing 400016, China*

<sup>b</sup> *Department of Respiratory and Critical Care Medicine, the First Affiliated Hospital, Chongqing Medical University, Chongqing 400042, China*

\* Corresponding author: E-mail address: [xiaolanyang666@cqmu.edu.cn](mailto:xiaolanyang666@cqmu.edu.cn)

## **Note 1. Optimization of conditions of the biosensing platform.**

### **Note 1.1. MoS<sub>2</sub> NSs concentration**

To achieve a better analytical performance, we first determined the effect of the MoS<sub>2</sub> NS concentration. MoS<sub>2</sub> NSs solutions with different concentrations were incubated with a CsPbBr<sub>3</sub> QD-DNA solution at 1 mg mL<sup>-1</sup>. As shown in Fig. S5a, the FL intensity ratios,  $F/F_0$  (where  $F$  and  $F_0$  referred to the FL intensity of CsPbBr<sub>3</sub> QDs-DNA in the presence and absence of MoS<sub>2</sub> NSs, respectively), decreased gradually with increasing concentrations of MoS<sub>2</sub> NSs from 0.2 to 2.0 µg mL<sup>-1</sup>, but increased when the concentration of MoS<sub>2</sub> NSs exceeded 2.0 µg mL<sup>-1</sup>. This reversed phenomenon can be attributed to the aggregation of MoS<sub>2</sub> NSs. Therefore, 2.0 µg mL<sup>-1</sup> was chosen for DNA detection.

### **Note 1.2. Adsorption and hybridization times**

The FL intensity ratio,  $F/F_0$ , corresponding to the adsorption time between ssDNA and MoS<sub>2</sub> NSs from 5 to 60 min is shown in Fig. S5b. There was a significant decrease in the fluorescence of CsPbBr<sub>3</sub> QDs-DNA with increasing adsorption time, and it reached a plateau at 40 min. To optimize the hybridization time, the CsPbBr<sub>3</sub> QDs-DNA solution was incubated with the target sequence for different times prior to the addition of MoS<sub>2</sub> NSs (Fig. S5c). The FL intensity ratio,  $F/F_0$  (where  $F$  and  $F_0$  refer to the FL intensity of the CsPbBr<sub>3</sub> QDs-DNA/MoS<sub>2</sub> NSs in the presence and absence of the target sequence, respectively), gradually increased with increasing incubation time and remained stable for approximately 30 min. Therefore, adsorption and hybridization times of 40 and 30 min, respectively, were used to detect the target sequence.

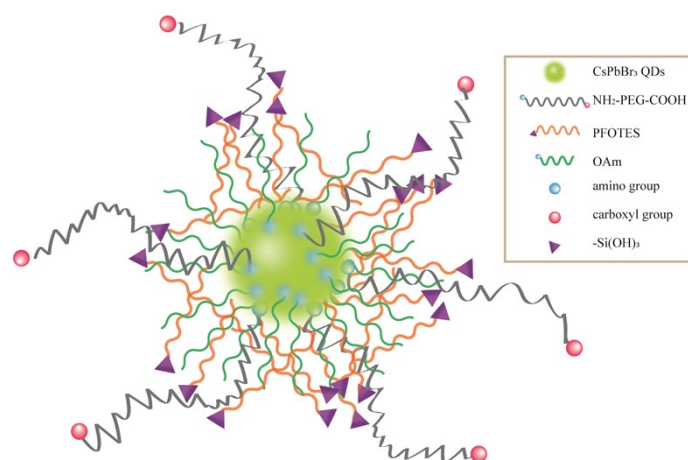

**Fig. S1** Schematic diagram of the synergy of NH<sub>2</sub>-PEG-COOH, PFOTES and OAm on CsPbBr<sub>3</sub>-COOH QDs.

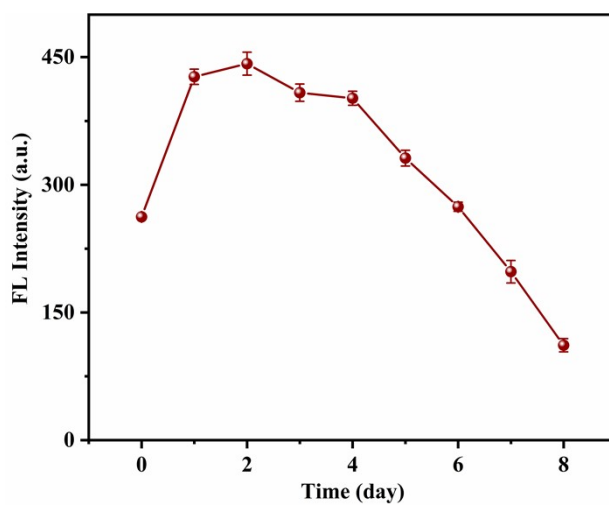

**Fig. S2** The stability of FL intensity of OAm/PEG-CsPbBr<sub>3</sub> QDs in aqueous solution.

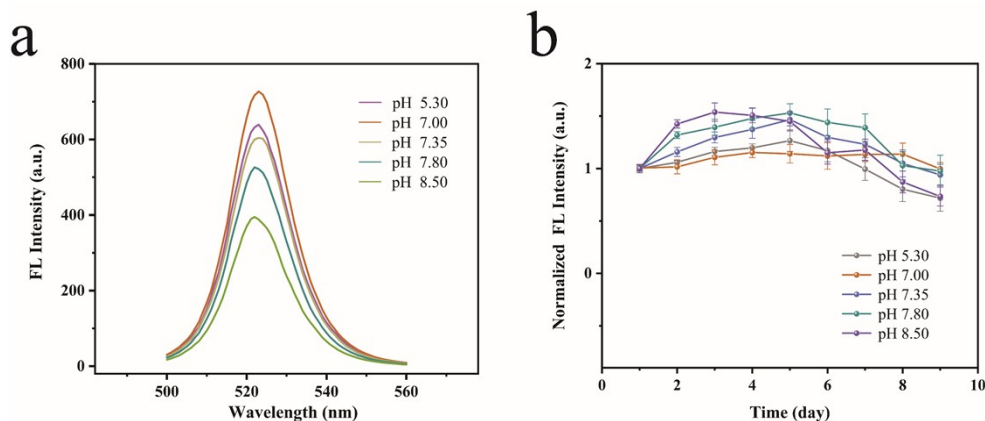

**Fig. S3** The stability of CsPbBr<sub>3</sub>-COOH QDs in different pH solutions. (a) Fluorescence emission spectra of CsPbBr<sub>3</sub>-COOH QDs solution (0.5 mg mL<sup>-1</sup>) diluted by different pH solutions (pH=5.3, 7.0, 7.35, 7.8, 8.5). (b) The stability of CsPbBr<sub>3</sub>-COOH QDs solution diluted by different pH solutions.

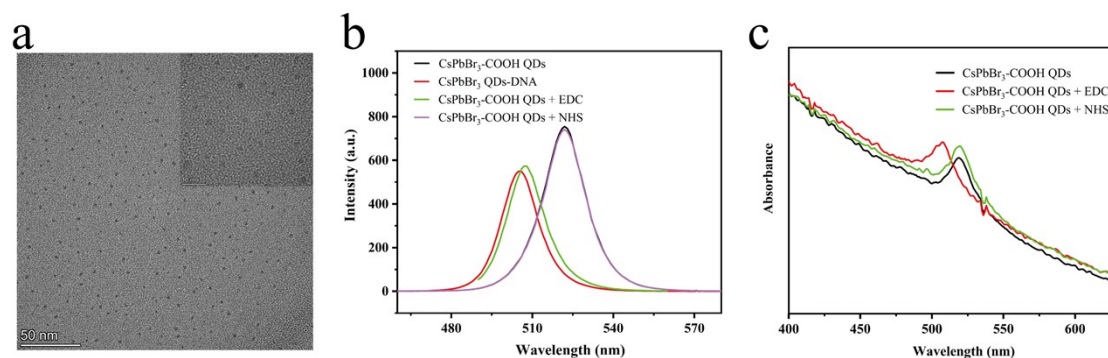

**Fig. S4** (a) TEM images of CsPbBr<sub>3</sub> QDs-DNA. (b) Fluorescence spectra of CsPbBr<sub>3</sub>-COOH QDs (black), CsPbBr<sub>3</sub> QDs-DNA (red), the mixture of CsPbBr<sub>3</sub>-COOH QDs and EDC (green) and the mixture of CsPbBr<sub>3</sub>-COOH QDs and NHS (purple). (c) Absorption spectra of CsPbBr<sub>3</sub>-COOH QDs (black), the mixture of CsPbBr<sub>3</sub>-COOH QDs and EDC (red) and the mixture of CsPbBr<sub>3</sub>-COOH QDs and NHS (green).

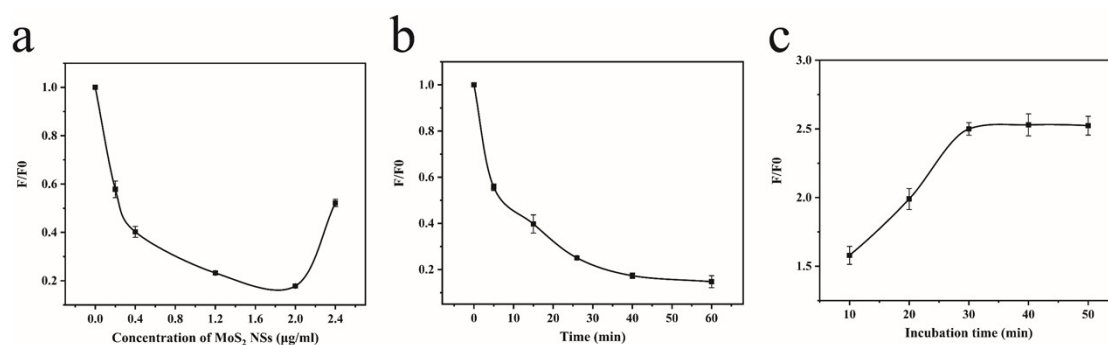

**Fig. S5** Optimization of the experimental conditions. (a) The effect of the MoS<sub>2</sub> NS concentrations with the final concentration of CsPbBr<sub>3</sub> QDs-DNA fixed at 1.0 mg mL<sup>-1</sup>. (b) The effect of adsorption time. (c) The effect of hybridization time between CsPbBr<sub>3</sub> QDs-DNA and target. CsPbBr<sub>3</sub> QDs-DNA: 1.0 mg mL<sup>-1</sup>; MoS<sub>2</sub> NSs: 2.0 μg mL<sup>-1</sup>. Error bars represented the standard deviation of three measurements.

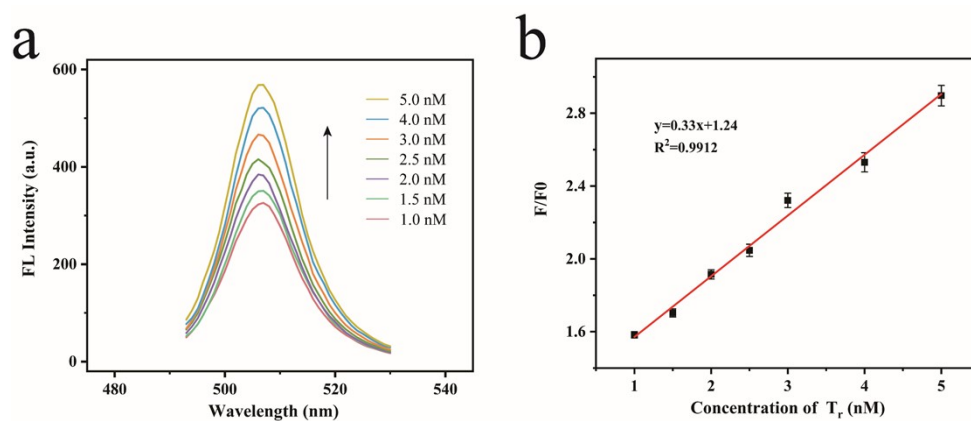

**Fig. S6** Linear response of FL intensity to T<sub>r</sub> concentrations. (a) Fluorescence spectra of CsPbBr<sub>3</sub> QDs-DNA<sub>2</sub>/MoS<sub>2</sub> NSs biosensing platform in the presence of T<sub>r</sub> from 1.0 to 5.0 nM. (b) Calibration curves for T<sub>r</sub> detection.

**Table S1.** DNA sequences for experiments.

| Oligonucleotides                | Sequence (5' → 3')                                        |
|---------------------------------|-----------------------------------------------------------|
| ssDNA                           | NH <sub>2</sub> -C <sub>6</sub> -GTCATTGCGTCATTCCTTCGATT  |
| Target: Mtb DNA                 | AATCGAAGGAAATGACGCAATGAC                                  |
| ssDNA 2                         | NH <sub>2</sub> -C <sub>6</sub> -GCGCCGACTGTTGGCGCTGGGGCC |
| T <sub>r</sub>                  | GGCCCCAGCGCCAACAGTCGGCGC                                  |
| M2: two-base mismatched target  | AATCGAAGGAAGTGACGCACTGAC                                  |
| M4: four-base mismatched target | ACTCGAAGGTAGTGACGCACTGAC                                  |
| R: random sequence              | GTGTCGTCTTCAGAATACCATGCT                                  |
